# Supplementary material
Source: PubMed Central journal article supplement (PMC2659220)
Supplement: M808914200_1.pdf [file M808914200_1.pdf]

## SUPPLEMENTAL DATA

### Dynafit Files

All concentrations and parameter units are expressed in  $\mu\text{M}$ ,  $\mu\text{M}^{-1}\text{s}^{-1}$ , or  $\text{s}^{-1}$

1. Models used for simulation of cytochrome *b* reduction kinetics by  $\text{QH}_2$  in the presence of stigmatellin (Fig. 1A, 2 and S1).

A. Assuming intermonomeric electron equilibration (Fig. 1A).

#### REACTION MECHANISM

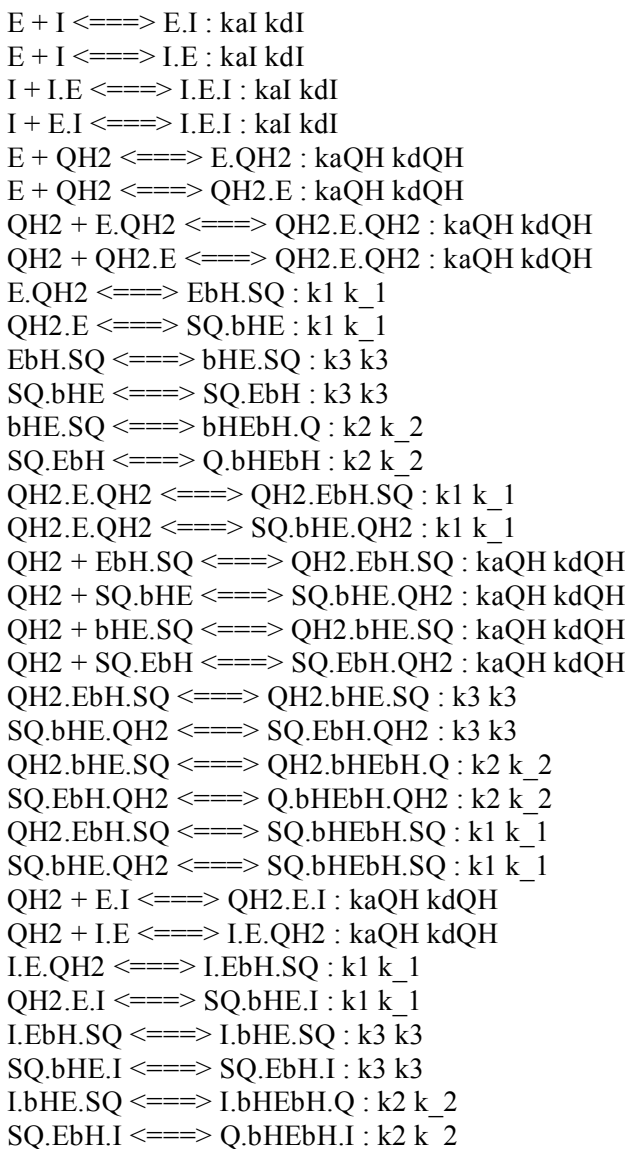

## CONSTANTS

$k_{aQH} = 1.5$  ,  $k_{aI} = 0.15$  (association rate constants for quinol and inhibitor)

$k_{dQH} = 30$  ,  $k_{dI} = 0.001$  (dissociation rate constants for quinol and inhibitor)

$k_1 = 200$ ,  $k_{-1} = 400$  (forward and reverse rates for semiquinone formation from quinol)

$k_2 = 400$ ,  $k_{-2} = 150$  (forward and reverse rates for quinone formation from semiquinone)

$k_3 = 500$  (intermonomeric electron transfer)

RESPONSES (molar extinction coefficients x 2 to account for a 2 cm pathlength)

$E_{bH.SQ} = 0.072$

$SQ.b_{HE} = 0.072$

$b_{HE.SQ} = 0.072$

$SQ.E_{bH} = 0.072$

$Q.b_{HEbH} = 0.144$

$b_{HEbH.Q} = 0.144$

$QH_2.E_{bH.SQ} = 0.072$

$SQ.b_{HE.QH_2} = 0.072$

$QH_2.b_{HE.SQ} = 0.072$

$SQ.E_{bH.QH_2} = 0.072$

$SQ.b_{HEbH.SQ} = 0.144$

$QH_2.b_{HEbH.Q} = 0.144$

$Q.b_{HEbH.QH_2} = 0.144$

$I.E_{bH.SQ} = 0.072$

$SQ.b_{HE.I} = 0.072$

$I.b_{HE.SQ} = 0.072$

$SQ.E_{bH.I} = 0.072$

$Q.b_{HEbH.I} = 0.144$

$I.b_{HEbH.Q} = 0.144$

B. Assuming movement of the inhibitor between center N sites (Fig. 2) or fast inhibitor dissociation rate (Fig. S1) without intermonomeric electron equilibration.

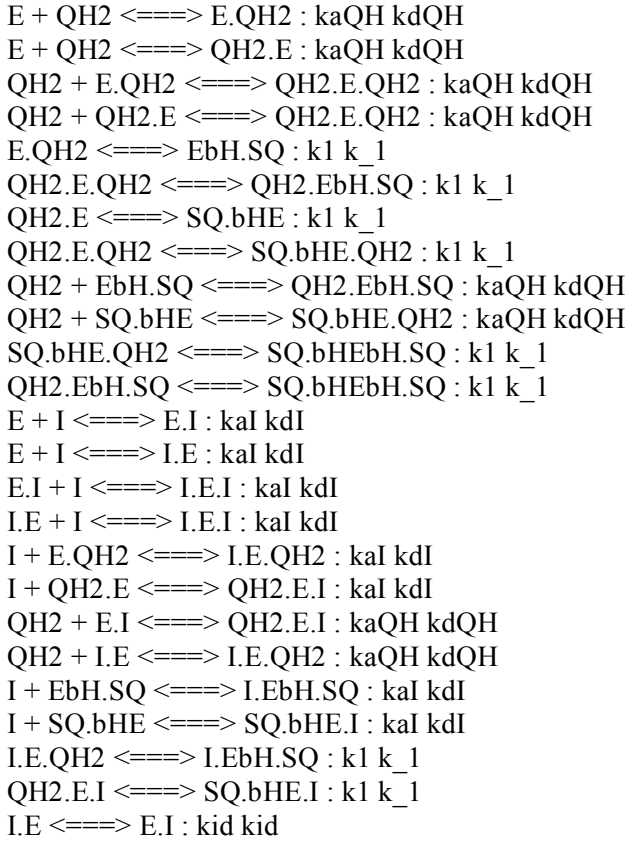

#### CONSTANTS

kaQH = 1.5, kaI = 0.15 (1500 in Fig. S1)

kdQH = 30, kdI = 0.001 (10 in Fig. S1)

k1 = 270, k<sub>-1</sub> = 100

kid = 500 (intermonomeric movement of the inhibitor; all values between 0 and 50000 yielded identical curves)

RESPONSES (molar extinction coefficients x 2 to account for a 2 cm pathlength)

EbH.SQ = 0.072

SQ.bHE = 0.072

QH2.EbH.SQ = 0.072

SQ.bHE.QH2 = 0.072

SQ.bHEbH.SQ = 0.144

I.EbH.SQ = 0.072

SQ.bHE.I = 0.072

## CONCENTRATIONS

E = 0.75 (dimer)  
QH2 = 15

## PROGRESS

equilibrate E = 0.75, I = 0, 0.13, 0.26, 0.39, 0.52, 0.65, 0.78, 0.91, 1.04, 1.15, 1.28, 1.4, 1.53, and 1.82, dilute 1:1 (indicates pre-equilibration with I before mixing with QH2)

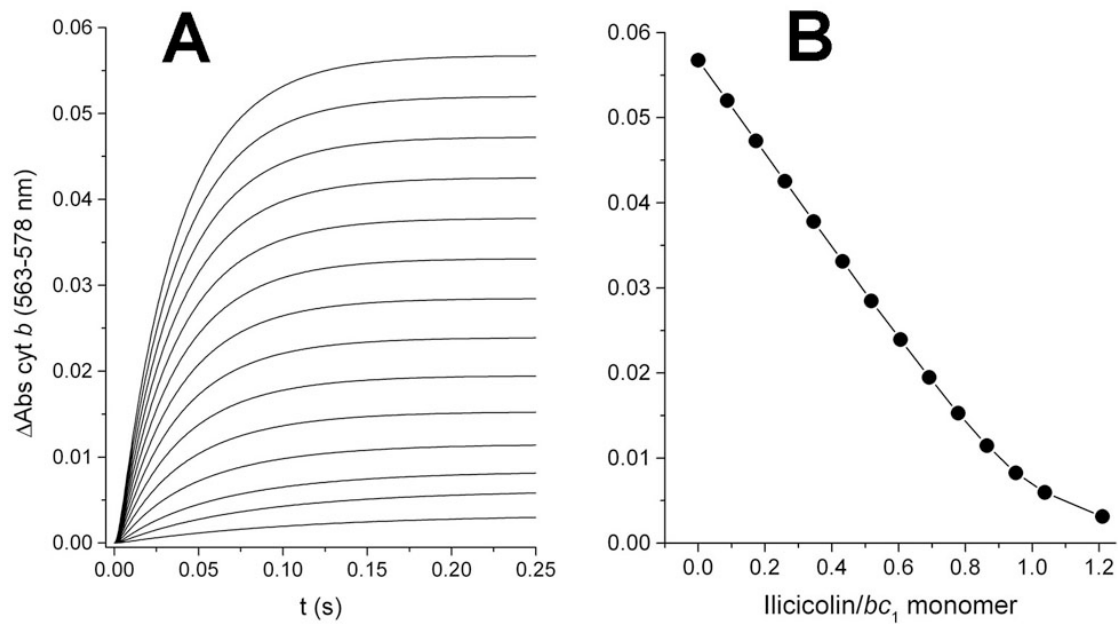

Fig. S1. **Simulation of the inhibition of pre-steady state reduction by an inhibitor with a high dissociation rate.** Simulated kinetic traces at the same concentrations of illicolin as in Fig. 1 were obtained assuming a dissociation rate of  $10 \text{ s}^{-1}$  for the inhibitor according to model B (panel A). Panel B shows the extent of cytochrome *b* reduction obtained at 0.25 s for each of the simulated reduction kinetic curves, resulting in a linear inhibition pattern.

2. Model used for calculating the relative concentrations of dimers with zero (E) and/or one (E.I and I.E) inhibitor molecules (Fig. 1B and 3B).

#### REACTION MECHANISM

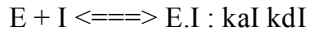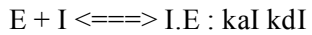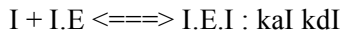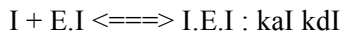

#### CONSTANTS

$$k_{aI} = 0.150$$

$$k_{dI} = 0.001$$

RESPONSES (molar extinction coefficients x 2 for 2 cm pathlength)

For Fig. 1B:

$$E = 0.053$$

$$E.I = 0.053$$

$$I.E = 0.053$$

For Fig. 3B:

$$E.I = 0.0051$$

$$I.E = 0.0051$$

#### CONCENTRATIONS

E = 0.5 (dimer), I variable from 0 to 1.2, step 0.001
